# Supplementary material
Source: PubMed Central journal article supplement (PMC2665063)
Supplement: M807361200_1.pdf [file M807361200_1.pdf]

## Supplementary Material

### **EVOLUTIONARY BASIS FOR THE COUPLED-DOMAIN MOTIONS IN *THERMUS THERMOPHILUS* LEUCYL-TRNA SYNTHETASE**

Kristina Mary Ellen Weimer, Brianne Leigh Shane, Michael Brunetto, Sudeep Bhattacharyya,  
and Sanchita Hati \*

Department of Chemistry, University of Wisconsin-Eau Claire, WI 54702

To whom correspondence should be addressed. S.H.: Phone: 715-836-3850; Fax: 715-836-4979;

Email: [hatis@uwec.edu](mailto:hatis@uwec.edu)

\* Corresponding authors

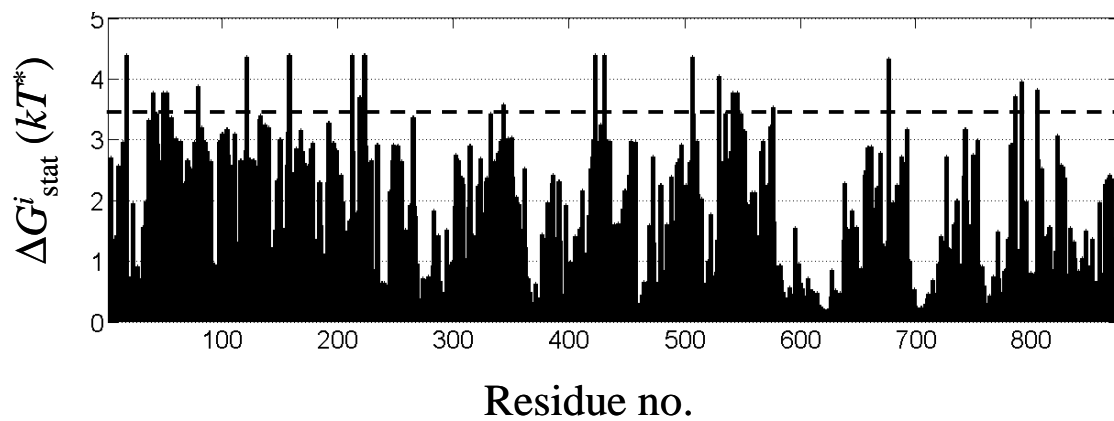

Figure S1. The plot of  $\Delta G_i^{\text{stat}}$  of Tt LeuRS showing evolutionary conservation.  $\Delta G_i^{\text{stat}}$  values were computed using equation 8 from a multiple sequence alignment containing 484 sequences of LeuRS family. Table 2 of the text represents the residues which is above the arbitrary threshold value of  $3.5 kT^*$  indicated by the broken line.

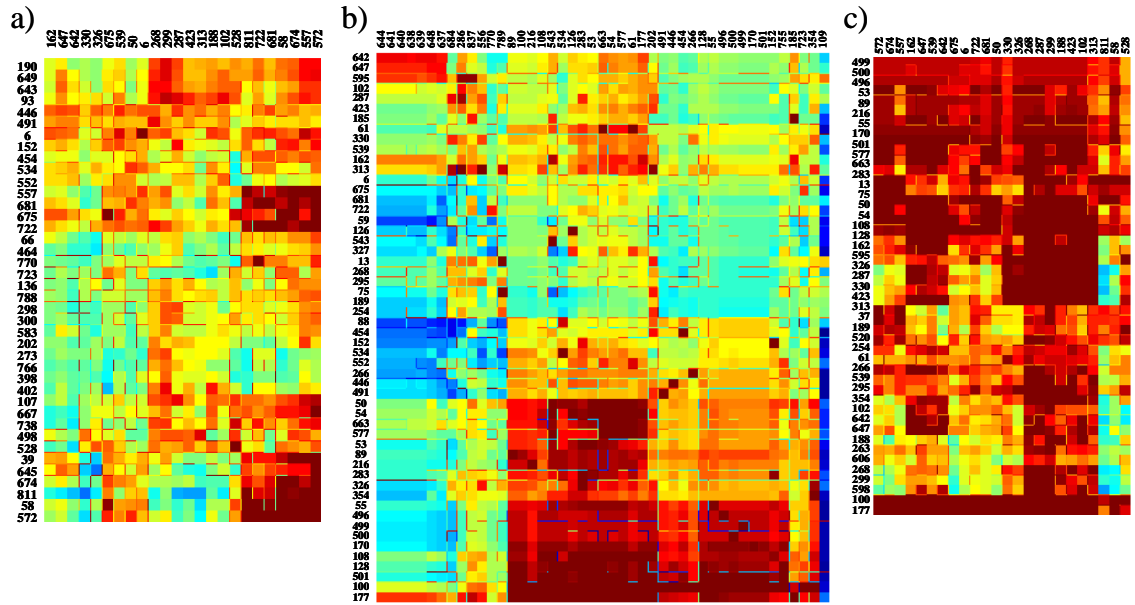

Figure S2. a-c) SCA plots showing coupling matrices of stage 2 clustering. The coupling values are normalized and represented with a color-coded scale. The highest correlated pairs are shown in red squares while the lowest correlated pairs are shown in blue squares.
